1 Submission date: 17 January 2021

2

3 **Expanding the marine range of the endangered black-capped petrel *Pterodroma hasitata*:**

4 **Occurrence in the northern Gulf of Mexico and conservation implications**

5

6 Patrick G.R. Jodice<sup>1\*</sup>, Pamela E. Michael<sup>2</sup>, Jeffrey S. Gleason<sup>3</sup>, J. Christopher Haney<sup>4</sup>, Yvan G.

7 Satgé<sup>2</sup>

8 <sup>1</sup>U.S. Geological Survey, South Carolina Cooperative Fish & Wildlife Research Unit, Clemson

9 University, Clemson, South Carolina 29634, USA

10 <sup>2</sup>South Carolina Cooperative Fish & Wildlife Research Unit, Clemson University, Clemson,

11 South Carolina 29634, USA

12 <sup>3</sup>U.S. Fish and Wildlife Service, Gulf Restoration Team, Chiefland, Florida 32626, USA

13 <sup>4</sup>Terra Mar Applied Sciences, LLC, Washington, D.C. 20012, USA

14 \*email: [pjodice@g.clemson.edu](mailto:pjodice@g.clemson.edu), Twitter @SCCoopUnit, @WSUChair

15 PGRJ ORCID 0000-0001-8716-120X

16 PEM ORCID 0000-0003-4420-864X

17 JCH ORCID 0000-0003-3742-8038

18 YGS ORCID 0000-0001-5148-8008

19

20     **ABSTRACT:** The black-capped petrel (*Pterodroma hasitata*) is an endangered seabird  
21 endemic to the western north Atlantic. Although estimated at ~ 1,000 breeding pairs, only ~ 100  
22 nests have been located at two sites in Haiti and three sites in the Dominican Republic. At sea,  
23 the species primarily occupies waters of the western Gulf Stream in the Atlantic and the  
24 Caribbean Sea. Due to limited data, there is currently not a consensus on the marine range of the  
25 species. There are several maps in use for the marine range of the species and these differ with  
26 respect to the north, south, and eastward extent of the range. None of these maps, however,  
27 includes the Gulf of Mexico. Here, we report on observations of black-capped petrels during two  
28 vessel-based survey efforts throughout the northern Gulf of Mexico from July 2010 - July 2011,  
29 and from April 2017 - September 2019. During the 558 days and 54.7 km of surveys from both  
30 efforts we tallied 40 black-capped petrels. Most observations occurred in the eastern Gulf,  
31 although birds were observed over much of the east-west and north-south footprint of the survey  
32 area. Predictive models indicated that habitat suitability for black-capped petrels was highest in  
33 areas associated with dynamic waters of the Loop Current, similar to habitat used along the  
34 western edge of the Gulf Stream in the western north Atlantic. We suggest that the range for  
35 black-capped petrels be modified to include the entire northern Gulf of Mexico although  
36 distribution may be more clumped in the eastern Gulf and patchier elsewhere. It remains unclear,  
37 however, which nesting areas are linked to the Gulf of Mexico.

38

39     **KEY WORDS:** Black-capped petrel; *Pterodroma hasitata*; Vessel surveys; Gulf of Mexico;  
40     Range

41

42

## INTRODUCTION

43 One of the most basic attributes needed for conservation planning for wildlife at the species level  
44 is a current map of annual range (Noss et al. 1997). Without such information, conservation  
45 threats cannot be understood and our ability to prioritize mitigation measures, conservation  
46 actions, and research is limited (Underhill & Gibbons 2002, Gibbons et al. 2010, Liminana et al.  
47 2015). For example, Cooper et al. (2019) recently revised the range for the endangered Kirtland's  
48 warbler (*Setophaga kirlandii*), and as a result of a redefined range the authors identified  
49 additional threats to, and research priorities for, that species. For many threatened and  
50 endangered avian species, the primary tools used to assess or refine the range are location-  
51 specific surveys and individual-based tracking. Surveys for endangered species typically use  
52 point-counts or transects to map occurrence of a species within a focal area. These focal areas  
53 may be chosen because they harbor some conservation threat or because the area has yet to be  
54 surveyed, but appears suitable for occupancy (Cooper et al. 2019, Ortega-Alvarez et al.  
55 2020). Surveys can also be conducted using newer technologies such as audio recording units or  
56 camera trapping, both of which can enhance sampling effort particularly in remote locations  
57 (Beirne et al. 2017, Schroeder & McRae 2020). The range of a species can also be refined based  
58 on data obtained from individual tracking efforts, and such data also can be used to locate  
59 previously unidentified breeding or nonbreeding areas (Kanai et al. 2002, McCloskey et al.  
60 2018). Advantages of the latter approach are that areas not previously considered or too remote  
61 to survey may be 'discovered', residency time within an area may be determined, and interactions  
62 of individuals with conservation threats may be identified (Jodice et al. 2015, Lamb et al. 2018,  
63 Phillips et al. 2018). More recently, citizen-science data, such as eBird ([www.ebird.org](http://www.ebird.org)), have

64 been used to add detail to the range of a species by providing unique or rare sightings (Cooper et  
65 al. 2019).

66

67 Defining the range of pelagic seabirds presents unique challenges given that the annual cycle is  
68 dominated by time spent in remote locations at sea. During the breeding season the spatial extent  
69 of the foraging range of pelagic seabirds can extend 100s to 1000s of kilometers, while during  
70 the nonbreeding season individuals can range over entire ocean basins (Jodice & Suryan 2010,  
71 Phillips et al. 2007, Rayner et al. 2010). Their extensive ranging behavior exposes individuals to  
72 a wide array of marine threats including oil and gas activity (Haney et al. 2017), bycatch  
73 mortality from fisheries operations (Anderson et al. 2011), and pollution events (Provencher et  
74 al. 2020). These threats often occur across multiple political boundaries or in international  
75 waters, the latter of which can be poorly monitored and regulated (Jodice & Suryan  
76 2010). Therefore, range maps for pelagic seabirds are often lacking in detail, despite this group  
77 having a high proportion of threatened and endangered species (Croxall et al. 2012, Dias et al.  
78 2019). Because range maps for seabirds often lack resolution, spatially explicit assessments of  
79 conservation threats also can be deficient for this group of birds (Oppel et al. 2012, Jodice et al.  
80 2019). The combination of poorly defined marine ranges and transboundary marine threats adds  
81 to the conservation challenges faced by many species of pelagic seabirds.

82

83 Among seabirds, one of the least studied and most threatened groups are the gadfly petrels  
84 (*Pterodroma* spp.), which often nest on remote islands and inhabit pelagic waters both near and  
85 distant to their nesting areas. The Atlantic Ocean supports 11 species of gadfly petrel (Ramos et  
86 al. 2017), two of which are extant in the western North Atlantic (*P. cahow* and *P. hasitata*).

87 Here, we focus on black-capped petrel (*Pterodroma hasitata*; also known locally as Diablotín).  
88 Simons et al. (2013) provide a thorough review of the biology and conservation of the species  
89 and Satgé et al. (2020) of nesting habitat relationships. This species is considered globally  
90 endangered (BirdLife International 2020; hereafter, any reference to the species as endangered  
91 refers to its global status) and is under consideration for listing as Threatened with 4(d) under the  
92 U.S. Endangered Species Act (USFWS 2018; 83 FR 50560). Black-capped petrels nest in the  
93 understory of montane forests at 1,500 – 2,000 m above sea level in burrows and crevices. The  
94 breeding season occurs primarily from February – July with birds dispersing at sea thereafter  
95 (Simons et al. 2013). The black-capped petrel was considered extinct in the mid-1900s but was  
96 rediscovered in 1963 when nests were located in the Massif de la Selle of southeastern Haiti  
97 (Wingate 1964). Since that time, ~100 nests have been found (n = two sites in Haiti, n = three  
98 sites in the Dominican Republic; Fig. 1). The nesting area in Valle Nuevo in the Cordillera  
99 Central of the Dominican Republic was documented to support nesting only as recently as 2018.  
100 Nesting is suspected in Dominica and Cuba but has yet to be confirmed.

101

102 At-sea, most of what is known about the range of the species is based on observations from  
103 vessel-based surveys in the western north Atlantic (Haney 1987, Simons et al. 2013, Winship et  
104 al. 2018) and recent efforts to track individuals (Jodice et al. 2015, Satgé et al. 2019). These data  
105 sets primarily place the range of the species in the western north Atlantic between ~ 30 - 40  
106 degrees latitude and west of the Gulf Stream, although waters east of the Gulf Stream and in the  
107 Caribbean Sea also were highlighted as use areas via tracking data. Based on these data, several  
108 sources have developed range maps for the species and while each differs slightly, all focus on  
109 waters west of the Gulf Stream and none include definitive use of the Gulf of Mexico (Fig.

110 1). The species also occurs in both a light and dark color morph (Howell & Patteson 2008); it is  
111 unclear, however, if the ranges of these two morphs are similar or disparate either spatially or  
112 temporally.

113

114 Herein, we provide new documentation for expanding the marine range of the endangered black-  
115 capped petrel to include the northern Gulf of Mexico. We used data from two vessel-based  
116 survey efforts that occurred throughout the northern Gulf and used a machine-learning modeling  
117 approach to describe basic habitat relationships in this basin. These data represent a substantial  
118 refinement of the marine range of a globally endangered species and do so in a region with  
119 extensive offshore oil and gas exploration and development.

120

121

## METHODS

122

### At-sea surveys

123 Observations of black-capped petrels in the Gulf of Mexico (hereafter, GoM or Gulf) were  
124 collected during vessel-based surveys for pelagic seabirds conducted as part of two survey  
125 programs (Table S1). Surveys to support the post-spill injury assessment for the *Deepwater*  
126 *Horizon* Oil Spill Natural Resources Damage Assessment (NRDA) were designed to record  
127 occurrences of seabirds and assess mortality and visible oiling (hereafter NRDA cruises; Haney  
128 2011). NRDA cruises ( $n = 27$ ; see Haney et al. 2019 for a detailed description) were conducted  
129 in the northern GoM within the U.S. Exclusive Economic Zone (EEZ) from July 2010 - July  
130 2011 by experienced seabird observers (Fig. 2a). Surveys were conducted across 283 days and  
131 ~15,300 km of transects (Table S1). Surveys to support the Gulf of Mexico Marine Assessment  
132 Program for Protected Species (hereafter GoMMAPPS cruises) sought to model the distribution

133 of seabirds, marine mammals, and sea turtles in the northern Gulf in relation to oil and gas  
134 activities among planning areas delineated by the U.S. Bureau of Ocean Energy Management  
135 (BOEM; <https://www.boem.gov/regions/gulf-mexico-ocs-region>). GoMMAPPS surveys ( $n =$   
136 20) were conducted in the northern GoM within the U.S. EEZ from April 2017 - September 2019  
137 by experienced seabird observers (Fig. 2b). GoMMAPPS surveys were conducted from National  
138 Oceanic and Atmospheric Administration (NOAA) vessels of opportunity that were designed to  
139 survey for marine mammals or to collect fisheries/plankton data. Surveys were conducted during  
140 275 days and ~39,400 km of transects (Table S1).

141 Data collection during each survey program followed a standardized protocol for collection of  
142 marine fauna at sea (e.g., Tasker 2004). Briefly, trained observers surveyed for seabirds from a  
143 platform onboard the vessel situated ~13-15 m above the sea surface. While the vessel was  
144 underway at a speed  $\geq$  ~11 km/h, the observer used  $\geq$  10x binoculars to identify to the lowest  
145 taxonomic level all sitting and flying seabirds within view. Observations were made from the  
146 side of the ship with the least glare (i.e., focal side). Following standard protocols, we recorded  
147 all seabirds within a 90° forward-facing arc. Relatively low densities and good observation  
148 conditions in the GoM, however, generally allowed species-specific identification and accurate  
149 counts beyond the typical 300 m width, out to ~ 700 m from the ship. Because black-capped  
150 petrels are surface foragers we did not need to account for time below the surface or observations  
151 missed during diving. During NRDA cruises, observations of seabirds were recorded manually  
152 (i.e., paper, voice recording) along with the exact time and later synchronized with the position  
153 of the ship as recorded by GPS at 10-minute intervals. During GoMMAPPS cruises, observations  
154 were recorded in real-time using the software package SEEBIRD (Ballance & Force 2016). For  
155 each entry, the observer recorded the species, number of individuals, distance bin or approximate

156 distance, associations with other species, behavior, flight direction, flight height, flight angle, and  
157 when possible age, sex, and plumage. SEEBIRD records date, time, and GPS location at the time  
158 the record is initially ‘opened’ via direct connection with the ships navigation system.

159

160 To complement our data, we also sought other records of black-capped petrels in the Gulf of  
161 Mexico. We reviewed published literature and reports from seabird surveys conducted during the  
162 GulfCet I and II programs (Davis and Fargion 1995, Ribic et al. 1997, Davis et al. 2000). We  
163 also reviewed compilations that included seabirds (Duncan and Havard 1980, Clapp et al. 1982)  
164 and a monograph focused on the black-capped petrel (Simons et al. 2013). Lastly, we searched  
165 eBird for records of black-capped petrels.

166

167

### **Modelling approach**

168 We modeled the probability of occurrence of black-capped petrels based on habitat suitability in  
169 the northern Gulf of Mexico using the maximum entropy approach in Program Maxent (Version  
170 3.4.2; [https://biodiversityinformatics.amnh.org/open\\_source/maxent/](https://biodiversityinformatics.amnh.org/open_source/maxent/); Phillips et al. 2006).

171 Briefly, Maxent is a machine learning technique that estimates the probability of occurrence of a  
172 species across a specified area based on observations and a set of covariates (i.e., predictor  
173 variables that represent habitat conditions). Maxent performs well at relatively low sample sizes  
174 (i.e.,  $n < 100$  observations) by utilizing a presence-background algorithm that is less sensitive to  
175 sample size compared to other approaches used to model species distributions (Phillips et al.  
176 2006, Wisz et al. 2008). We chose to model only presence records (i.e., as opposed to modeling  
177 both presence and pseudo-absence data) due to dissimilarities in the documentation of survey



178 effort between NRDA and GoMMAPPS which prevented a fully standardized and comparable  
179 description of observation effort.  
180  
181 Using the Maxent interface, we estimated the probability of occurrence of black-capped petrels  
182 (based on habitat suitability, from 0 to 1) within 10,000 random background pixels across the  
183 entire Gulf of Mexico (i.e., “cloglog” output in Maxent). Data were modelled at a spatial  
184 resolution of 4.67 km based on the finest resolution available across the selected environmental  
185 data (see below for details). As observations occurred in only a portion of the study area, we  
186 applied “clamping” which, in Maxent, assumes that covariates from background pixels with  
187 values outside of the range of those from the training data can occur, but at low probabilities  
188 (i.e., at the tail end of the distribution; Philips et al. 2006). Clamping thus reduces the potential  
189 for predicting a high probability of occurrence in areas with covariate values well outside of  
190 those in the training data. We assessed model performance by separating the observations into  
191 randomly selected training and testing datasets (75%/25% split, respectively). We applied the  
192 model to the test data and used the area under the receiver operating characteristics curve (AUC)  
193 to quantify the predictive power of the model, where an AUC of 0.5 indicates no predictive  
194 power and an AUC of 1 indicates perfect discrimination (Bradley 1997). To balance the  
195 probability of incorrectly identifying suitable and unsuitable areas, we used the equal test  
196 sensitivity and specificity threshold (Cantor et al. 1999, Liu et al. 2005). We characterized the  
197 permutation importance of each covariate (the sensitivity of the model to a given covariate,  
198 holding all other covariates constant) using a jackknife procedure, a resampling approach to  
199 estimate variance and bias (Efron 1992).

200 We modeled observations of black-capped petrels in relation to static and dynamic  
201 environmental variables which were selected based on habitat relationships described for black-  
202 capped petrels in the Gulf Stream of the western North Atlantic (Haney 1987, Winship et al.  
203 2018) and on other surface feeding seabirds in the Gulf of Mexico (Poli et al. 2017). Each  
204 dynamic variable was calculated as the temporal average based on daily dynamic variables for  
205 each date when a black-capped petrel was observed, weighted by the number of presence records  
206 of petrels on a given day. We obtained the daily dynamic variables of sea-surface temperature,  
207 sea-surface salinity, sea-surface height, and surface current velocity (eastward ( $u$ ) and  
208 northward( $v$ )) from the Hybrid Coordinate Ocean Model (HYCOM; Chassignet et al. 2009,  
209 Metzger et al. 2017). Surface current velocity was also used to calculate absolute current strength  
210 and current direction, each of which were subsequently included in the Maxent model as  
211 covariates. Although we considered including chlorophyll  $a$  as a predictor variable, spatial gaps  
212 in coverage would have resulted in the omission of observations of petrels. Preliminary  
213 assessments revealed that including chlorophyll  $a$  did not improve model performance and we  
214 therefore excluded chlorophyll  $a$  from subsequent analyses. Lastly, we included average depth as  
215 calculated from the SMRT30+ version 6.0 30 arc second dataset (Becker et al 2009). We  
216 aggregated each variable to the coarsest native spatial resolution available across all variables  
217 ( $\sim 4.67$  km). Therefore, the spatial resolution of the subsequent model (i.e., the resolution at  
218 which occurrence probability can be interpreted) is 4.67 km x 4.67 km which is comparable to  
219 similar data sets from vessel-based surveys in the western north Atlantic (e.g., Winship et al.  
220 2018). The degree of covariance and correlation between environmental covariates was assessed  
221 using the Band Collection Statistics tool in ArcMap 10.8. None of the covariates exceeded the  
222 Pearson's correlation coefficient of  $|0.75|$  threshold for exclusion. Thus, all covariates were

223 retained. Unless otherwise noted, covariates were processed in R (R Development Core Team  
224 2019).

225 To develop a proposed range within the Gulf of Mexico for black-capped petrels we used  
226 utilization distributions (UD) with kernel density estimation. We computed the 90% UD contour  
227 for all observation records from the NRDA and GoMMAPPS systematic surveys (package  
228 adehabitat in R; Calenge 2006). We then constructed a minimum convex polygon (MCP) that  
229 encompassed the areas represented by the utilization distribution contours and propose that area  
230 bounded by the MCP as the proposed range.

231

232

## RESULTS

233

### Previous records in the Gulf of Mexico

234 We searched published literature and reports for previous records of the species in the Gulf of  
235 Mexico (Table 1). Neither systematic surveys nor compilations of records noted any definitive  
236 observations of black-capped petrels at sea in the Gulf from ~ 1900 – 2010. Approximately 9-11  
237 opportunistic records were reported in the mid-1990s and 2010s (e.g., birding records). Two of  
238 these birding records, in November 2016 and January 2017 and each occurring ~220 km  
239 southeast of Galveston Bay, Texas (~ 27.5°, -94.3°), are the only records of black-capped petrels  
240 in the Gulf during those months of the year (see below). Other efforts to summarize observations  
241 of black-capped petrels at-sea have a restricted range (e.g., Leopold et al. 2019 in the Caribbean  
242 Sea, Winship et al., 2018 in the Atlantic) and therefore do not include Gulf waters.

243

244

### Survey data

245 Observations made on NRDA cruises totaled nine black-capped petrels (Table 2, Fig. 3); six as  
246 singletons and one observation of three birds. One light-morph individual was observed in July  
247 2010 in the eastern Gulf. Eight of the petrels observed during NRDA cruises occurred in waters  
248 east of the Mississippi River delta, while one bird was observed just west of the delta. Seven of  
249 the eight observations occurred in waters over the continental shelf break and slope. The  
250 southern extent of observations occurred slightly south and west of the western extent of the  
251 Florida Keys. We observed petrels in February - May, and July - September. Petrels were not  
252 observed during cruises in October – December, or in June.

253  
254 Observations made on GoMMAPPS cruises totaled 31 black-capped petrels, 27 of which  
255 included single birds and two observations of two birds (Table 2, Fig. 3). Three of the petrels  
256 observed on GoMMAPPS cruises were classified as light-morph individuals (March and August  
257 2018 in the eastern Gulf). Most observations of black-capped petrels occurred in the eastern  
258 Gulf, east of -88° Longitude, although birds were observed over much of the east-west and north-  
259 south footprint of the survey area. We observed petrels in March - May and July - September.  
260 We did not observe birds on cruises in January - February, June, or October.

261

262

263

### **Predictive Models**

264

265 Our predictive model was relatively robust and generated an average AUC value of 0.909 for the  
266 training data set and 0.775 for the testing data set, compared to a maximum possible AUC of  
267 0.877 (based on data being drawn from the Maxent distribution itself; Phillips et al. 2006).

268 Maxent identified three general areas with relatively higher habitat suitability for black-capped  
269 petrels (Fig. 4). The most extensive of these occurs just west of the Florida shelf and extends  
270 along the north-south length of the Florida peninsula. Modeled habitat suitability also was higher  
271 south of the Mississippi River delta and within a narrow east-west band paralleling much of the  
272 Texas and Louisiana continental slope. Areas of lower habitat suitability include shelf/slope and  
273 pelagic waters in the central Gulf.

274

275 For black-capped petrels in the Gulf of Mexico, sea-surface salinity was the most important  
276 predictor of habitat suitability followed by the direction of the current and sea-surface height  
277 (Table 3). Habitat suitability was predicted to peak at moderate values of sea-surface height (Fig.  
278 5a), to increase as currents were more eastward to southward (Fig. 5b), and to increase until a  
279 threshold with increasing salinity (Fig. 5c). Sea-surface salinity had the greatest permutation  
280 importance, with current direction and sea-surface height having less importance (Table 3).

281

282

## DISCUSSION

283 Since the early 2000s, most effort invested in improving our understanding of the range of the  
284 black-capped petrel has been focused on locating nesting areas and detailing their areal extent.  
285 The marine range, in contrast, has been broadly accepted as being focused in waters of the  
286 Caribbean Sea (i.e., nearby known nesting areas) and along the western edge of the Gulf Stream  
287 in the western North Atlantic (Simons et al. 2013). This range is based on observations from  
288 vessel-based surveys focused primarily in the mid- and South-Atlantic bights of the U.S. that  
289 date back to the 1980s (Simons et al. 2013). Recent efforts to model the habitat preference of the  
290 species to support marine spatial planning in the western North Atlantic have also emphasized

291 the western edge of the Gulf Stream and waters of the South Atlantic Bight as the primary  
292 marine range (Winship et al. 2018). Furthermore, tracking data from individuals tagged at nests  
293 in the Dominican Republic found that while waters of the southern Caribbean Sea and east of the  
294 Gulf Stream were used regularly during chick-rearing and post-breeding, waters of the Gulf of  
295 Mexico were not utilized (Jodice et al. 2015). Therefore, the Gulf of Mexico has yet to be  
296 recognized as a regular component of the marine range of the species.

297  
298 Consequently, results from the NRDA and GoMMAPPS surveys have substantially revised our  
299 understanding of the marine range of the black-capped petrel. While prior data reviews and  
300 systematic vessel-based surveys in the Gulf failed to detect the species at-sea, we tallied 40  
301 individuals, including light morph birds, across both efforts. Most observations of the species  
302 occurred east of  $\sim 90^\circ$  W, an area of the northern Gulf characterized as ‘high energy’ (Sturges and  
303 Leben 2000). Most NRDA and GoMMAPPS observations in this region were along the  
304 northwestern, northern, and eastern borders of the highly dynamic Loop Current, all areas  
305 especially prone to formation of eddies and detached rings (Yang et al. 2020). Black-capped  
306 petrels are therefore making extensive use of edges along a western boundary current system  
307 inside the Gulf, quite similar to its habits along the western boundary current system along the  
308 Gulf Stream in the Atlantic Ocean (e.g., Haney 1987, Simons et al. 2103, Winship et al. 2018).  
309 Conversely, only seven records of black-capped petrels were obtained from all surveys in the  
310 central and western portions of the northern Gulf of Mexico ( $\sim 90 - 97^\circ$  W). Although some  
311 scarcity of records here might be due to lower overall survey effort, our habitat model does not  
312 suggest this region of the Gulf contains as much suitable habitat. In fact, black-capped petrels  
313 have not been observed west of  $\sim 95.5^\circ$  W despite 71 days of pelagic birding trips conducted off

314 south Texas from 1994–2018 (<https://texaspelagics.com/summary-table/>), some or all of which  
315 were in deeper waters preferred by this species.

316

317 Observations of black-capped petrels in the southeastern Gulf are rare. eBird reports three boreal  
318 spring records (all in April) from inside the western Florida Straits near the Florida Keys and Dry  
319 Tortugas. A single black-capped petrel also was observed on 23 April 2011 headed northwards  
320 towards the Yucatan Channel southwest of Cozumel Island, Mexico (Haney et al. 2019).

321 Observations of black-capped petrels in these areas would be consistent with likely migratory  
322 paths between the Gulf of Mexico and known breeding sites on Hispaniola. Nonetheless, the  
323 breeding location, breeding status, or age of black-capped petrels using the Gulf remains  
324 unknown and no data are available on connectivity between nest sites and Gulf waters.

325 Individuals tracked from nest sites in the western Dominican Republic have not used Gulf waters  
326 (Jodice et al. 2015, Satgé et al. 2019). The closest known nesting area to the Gulf is in southern  
327 Haiti although nest sites are suspected west of that site in southeast Cuba. Our data and other  
328 records suggest black-capped petrels are present in the Gulf throughout the year, although 75%  
329 of the individuals we observed in the Gulf occurred during July – September (i.e., post-breeding  
330 phase). Our data are not, however, sufficient with respect to breeding status or age of individuals  
331 to document use of Gulf waters in relation to breeding status or age.

332

333 Our models predicted that habitat suitability for black-capped petrels increased primarily with  
334 increases in sea surface salinity (SSS), and to a lesser extent with south and eastward currents  
335 and with moderate values of sea surface height (SSH). Black-capped petrels therefore appear to  
336 be inhabiting waters that represent edges or boundaries of water masses. Spectacled petrels

337 (*Procellaria conspicillata*) in the eastern South Atlantic also were more abundant over waters  
338 with high SSS (Camphuysen 2001). In that region, edges of Agulhas Rings (eddies specific to  
339 the convergence zone between the Atlantic and Indian oceans) are characterized by relatively high  
340 SSS and strong currents, both of which appear to concentrate prey for petrels. In the Indian  
341 Ocean, Barau's petrel (*Pterodroma barau*) also tend to be associated with areas characterized by  
342 levels of salinity associated with boundaries of water masses (Pinet et al. 2009). Within the Gulf  
343 of Mexico, higher levels of SSS are associated with dynamic waters associated with the Loop  
344 Current (e.g., compared to waters associated with the continental edge) particularly along the  
345 west Florida Shelf (Paluskiewicz et al. 1983) where we observed the greatest number of black-  
346 capped petrels. In the northern Gulf, the presence of squid-eating cetaceans also was associated  
347 with higher salinity waters (Davis et al. 2000). Squid also represent a primary prey item for  
348 black-capped petrels (Simons et al. 2013). The other two variables of influence identified in our  
349 Maxent models, current direction and SSH, also suggest an association with waters that likely  
350 concentrate prey. For example, Poli et al. (2017) found that SSH influenced the foraging habitats  
351 of masked boobies (*Sula dactylatra*) and posited that this feature likely serves as a surrogate for  
352 availability of forage fish. Although most of our observations occurred over the continental shelf  
353 break and slope, our models did not identify bathymetry as a strong predictor likely due to the  
354 wide range in depth that occurs along the shelf break and slope in the Gulf.

355

356 While our data are insufficient to explicitly document conservation threats to the species, we can  
357 identify threats that are likely to occur at the macro-scale (i.e., spatial and temporal overlap of a  
358 threat and species occurrence; Burger et al. 2011). The Gulf of Mexico is considered one of the  
359 marine basins with the densest activity for the extraction of oil and gas (BOEM 2012). Three



360 potential conservation threats associated with this high level of oil and gas activity in the Gulf  
361 include collision with structures, interaction with produced waters (Middleditch 1984, Ramirez  
362 2005), and direct impacts from oil spills. Black-capped petrels are known to collide with lighted  
363 towers and structures near breeding sites (Simons et al. 2013) and therefore the potential may  
364 exist that collision may occur with lighted structures at-sea (Montevecchi 2006). Use of waters  
365 adjacent to active oil activity by seabirds may expose individuals to produced waters which  
366 include numerous chemical constituents (Veil et al. 2004, Welch & Rychel 2004). Exposure may  
367 be direct (e.g., contact with contaminated waters; O'Hara & Morandin 2010) or indirect (e.g.,  
368 ingestion of contaminated prey; Paruk et al. 2016). Petrels also may be exposed to both direct  
369 and indirect effects of oiling. Although no black-capped petrels have been recorded as mortalities  
370 from oil spills in the Gulf of Mexico, based on our data, individual petrels observed during the  
371 NRDA vessel survey were within the spatial footprint of the total slick area following the  
372 *Deepwater Horizon* blowout. Lastly, although commercial fishing activities are spatially and  
373 temporally widespread in the Gulf, the extent to which petrels overlap with these is unknown, as  
374 data with which to evaluate this threat are still relatively sparse. The species has not been  
375 historically identified in the records of pelagic observer programs although a recent study  
376 predicted that black-capped petrels may be at risk of bycatch in the pelagic longline fishery of  
377 the western north Atlantic (Simons et al. 2013, USFWS 2018, Zhou et al. 2019).

378

379 Integration of observations from NRDA and GoMMAPPS cruises and modeling in Maxent  
380 indicate that black-capped petrels are most likely to occur in the eastern region of the Gulf east  
381 of  $\sim 88^{\circ}\text{W}$  (Fig. 6a) where they appear to be associated with dynamic waters of the Loop  
382 Current. The species also occurs west to  $\sim 95^{\circ}\text{W}$  and south to  $\sim 24^{\circ}\text{N}$ , although in a patchier

383 distribution. Therefore, at a minimum, the northern Gulf of Mexico should be considered within  
384 the core marine range for the globally endangered black-capped petrel (Fig. 6b). Black-capped  
385 petrels occurred in all four of the marine ecoregions that comprise the Gulf of Mexico (Northern  
386 Gulf, Southern Gulf, Floridian, and Greater Antilles; Spalding et al. 2007). Nonetheless, gadfly  
387 petrels in general are highly mobile and rely on marine habitat that is highly dynamic in space  
388 and time. The definition of a marine range for such species might best be considered in terms of  
389 broad marine areas that offer habitat conditions amenable to foraging and flight. Therefore, an  
390 integration of both known occurrences and probabilistic occurrences based on habitat suitability  
391 appears to offer an approach that strikes a balance between the challenges of observing a rare and  
392 highly mobile species in remote locations and the predictive and informative nature of habitat  
393 modeling. We suggest that the range for black-capped petrels include the entire northern Gulf of  
394 Mexico with recognition that distribution may be more clumped in the eastern Gulf and patchier  
395 elsewhere. The results from models in Maxent predict there are some areas that offer suitable  
396 habitat within which we did not observe birds. Furthermore, the southern Gulf of Mexico  
397 remains under-surveyed for this species and hence represents a substantial data gap. With  
398 additional effort, areas that were modeled as suitable yet devoid of occurrences may receive  
399 additional survey attention and their status refined (e.g., southwestern Gulf).

400 Efforts to better understand the marine and terrestrial range of the black-capped petrel have been  
401 increasing in recent years and that has allowed for an enhanced ability to focus research and  
402 prioritize conservation actions by stakeholders (Goetz et al. 2012). As the number of  
403 observations of black-capped petrels in the Gulf increases, a reassessment of habitat  
404 associations, model fit, and model stability would appear to be warranted and would benefit  
405 agencies responsible for regulatory actions related to anthropogenic activities (e.g., oil and gas

406 extraction, wind-energy development, offshore fish farms), oil spill modeling and response  
407 efforts, and listing reviews. Efforts to deploy tracking devices on breeding black-capped petrels  
408 at nest sites (Jodice et al. 2015, Satgé et al. 2019) have improved our understanding of use areas,  
409 connectivity between use areas and known nesting areas, and fidelity to and residence time  
410 within use areas. To date, however, all tags deployed have been from only one nesting area in  
411 the western Dominican Republic, and none of the birds tagged were tracked to the Gulf of  
412 Mexico. Therefore, although our results suggest spatially and temporally widespread use of the  
413 Gulf, it remains unclear which of the few remaining nesting areas of black-capped petrels are  
414 directly linked to the Gulf of Mexico.

415

416

## ACKNOWLEDGEMENTS

417 Funding for the NRDA 2010-2011 surveys was provided through the Deepwater Horizon Natural  
418 Resources Damage Assessment administered by spill trustee Department of the Interior,  
419 USFWS. Funding for GoMMAPPS surveys was provided by BOEM to the US FWS (IAA  
420 #M17PG00011). Surveys were conducted on-board NOAA and other vessels. We are grateful to  
421 the crews and NOAA field party chiefs of the R/Vs *Gordon Gunter*, *Nancy Foster*, *Oregon II*,  
422 and *Pisces*, as well of the crews of UNOLS R/V *F.G. Walton Smith*, M/V *Nick Skanski*, and  
423 USGS cutter *Cypress* for their logistical support. We also thank the many seabird observers who  
424 participated in each program: Jonathan M. Andrew, Dan Bauer, Peter J. Blank, Katie Cowen,  
425 Dawn Breese, Sarah L. Flaherty, Logan Fordham, E. Wayne Irvin, Ron Goddard, Elizabeth T.  
426 Hug, Carol Keiper, David S. Lee, Matthew Love, Scott McConnell, Michelle McDowell,  
427 Nicholas Metheny, G. Scott Mills, Mark Oberle, Jim Panaccione, Stormy Paxton, Stephanie  
428 Powell, Carlos Sanchez, and Alex Wang. Kathy Hixson created and enhanced maps that appear

429 in the figures. Raul Ramos and Paige Byerly provided helpful reviews of the manuscript prior to  
430 submission. The South Carolina Cooperative Fish and Wildlife Research Unit is jointly  
431 supported by the U.S. Geological Survey, South Carolina DNR, and Clemson University. Any  
432 use of trade, firm, or product names is for descriptive purposes only and does not imply  
433 endorsement by the U.S. Government. The findings and conclusions in this paper are those of the  
434 author(s) and do not necessarily represent the views of the U.S. Fish and Wildlife Service.

### 435 LITERATURE CITED

- 436 Anderson ORJ, Small CJ, Croxall JP, Dunn EK, Sullivan BJ, Yates O, Black A (2011) Global  
437 seabird bycatch in longline fisheries. *Endanger Species Res* 14:91–106
- 438 Balance L, Force M (2016) Seabird distribution and abundance survey protocols. *Ecosystems*  
439 *Studies Program Southwest Fisheries Science Center, La Jolla*
- 440 Beirne C, Pillco-Huarcaya R, Serrano-Rojas SJ, Whitworth A (2017) Terrestrial camera traps:  
441 Essential tool for the detection and future monitoring of the Critically Endangered Sira  
442 curassow *Pauxi koepckeae*. *Endanger Species Res* 32:145–152
- 443 BirdLife International (2020) Species factsheet: *Pterodroma hasitata*. Downloaded from  
444 <http://www.birdlife.org> on 03/11/2020.
- 445 Bureau of Ocean Energy Management (BOEM). 2012. Gulf of Mexico Oil and Gas Lease Sales:  
446 2012-2017- Western Planning Area Lease Sales 229, 233, 238, 246, and 248 and Central  
447 Planning Area Lease Sales 227, 231, 235, 241, and 247. Final Environmental Impact  
448 Statement. Volumes I-III. U.S. Dept. of the Interior, Bureau of Ocean Energy Management,  
449 Gulf of Mexico OCS Region, New Orleans, LA. OCS EIS/EA BOEM 2012-019.

- 450 Burger J, Gordon C, Lawrence J, Newman J, Forcey G, Vlietstra L (2011) Risk evaluation for  
451 federally listed (roseate tern, piping plover) or candidate (red knot) bird species in offshore  
452 waters: A first step for managing the potential impacts of wind facility development on the  
453 Atlantic outer continental shelf. *Renew Energy* 36:338–351
- 454 Calenge, C (2006) The package adehabitat for the R software: a tool for the analysis of space and  
455 habitat use by animals. *Ecol Model* 197:516-519.
- 456 Camphuysen K (2001) The distribution of Spectacled Petrels *Procellaria conspicillata* in the  
457 south-eastern Atlantic. *Atlantic Seabirds* 3:1-12
- 458 Cantor SB, Sun CC, Tortolero-Luna G, Richards-Kortum R, Follen M (1999) A comparison of  
459 C/B ratios from studies using receiver operating characteristic curve analysis. *J Clinical*  
460 *Epidem* 52:885-892
- 461 Chassignet EP, Hurlburt HE, Metzger EJ, Smedstad OM, Cummings JA, Halliwell GR, Bleck R,  
462 Baraille R, Wallcraft AJ, Lozano C, Tolman H, Srinivasan A, Hankin S, Cornillon P,  
463 Wesberg R, Barth RHA, Werner F, Wilkin J (2009) US GODAE: global ocean prediction  
464 with the HYbrid Coordinate Ocean Model (HYCOM). *Oceanography* 22:64-75
- 465 Clapp, RB, Banks RC, Morgan-Jacobs D, Hoffman WA (1982) Marine birds of the southeastern  
466 United States and Gulf of Mexico. Part I. Gaviiformes through Pelecaniformes. US  
467 Department of the Interior, Fish and Wildlife Service, Office of Biological Services, Fish  
468 and Wildlife Special Report Number FWS/OBS-82-01, Washington, D.C.

- 469 Cooper NW, Ewert DN, Wunderle JM, Helmer EH, Marra PP (2019) Revising the wintering  
470 distribution and habitat use of the Kirtland's warbler using playback surveys, citizen  
471 scientists, and geolocators. *Endanger Species Res* 38:79–89
- 472 Croxall JP, Butchart SHM, Lascelles B, Stattersfield AJ, Sullivan B, Symes A, Taylor P (2012)  
473 Seabird conservation status, threats and priority actions: a global assessment. *Bird Conserv*  
474 *Int* 22:1–34
- 475 Davis RW, Fargion GS (1995) Distribution and abundance of cetaceans in the north-central and  
476 western Gulf of Mexico. Volume 1. OCS Study MMS 96-0026. New Orleans, LA
- 477 Davis RW, Ortega-Ortiz JG, Ribic CA, Evans WE, Biggs DC, Ressler PH, Cady RB, Leben RR,  
478 Mullin KD, Ursig BWU (2002) Cetacean habitat in the northern oceanic Gulf of Mexico
- 479 Dias MP, Martin R, Pearmain EJ, Burfield IJ, Small C, Phillips RA, Yates O, Lascelles B,  
480 Borboroglu PG, Croxall JP (2019) Threats to seabirds: A global assessment. *Biol Conserv*  
481 237:525–537
- 482 Duncan CD, Havard RW (1980) Pelagic birds of the northern Gulf of Mexico A preliminary  
483 summary of distribution and abundance with comments on field identification
- 484 Efron, B (1992) Bootstrap methods: another look at the jackknife. In: Kotz S and Johnson NL  
485 (eds) *Breakthroughs in statistics*. Springer, New York, p 569-593
- 486 Gibbons DW, Donald PF, Bauer HG, Fornasari L, Dawson IK (2007) Mapping avian  
487 distributions: The evolution of bird atlases. *Bird Study* 54:324–334

- 488 Goetz JE, Norris JH, Wheeler JA (2012) Conservation action plan for the Black-capped Petrel  
489 (*Pterodroma hasitata*). International Black-capped Petrel Conservation Group.
- 490 Haney JC (1987) Aspects of the pelagic ecology and behavior of the Black-capped Petrel  
491 (*Pterodroma hasitata*). Wilson Bull 99:153–168
- 492 Haney JC (2011) Pelagic seabird density and vulnerability to oiling from the Deepwater  
493 Horizon/MC-252 spill in the Gulf of Mexico: Draft Final Report to U.S. Fish and Wildlife  
494 Service
- 495 Haney JC, Hemming JM, Tuttle P (2019) Pelagic seabird density and vulnerability in the Gulf of  
496 Mexico to oiling from the Deepwater Horizon/MC-252 spill. Environ Monit Assess 191
- 497 Haney JC, Jodice PGR, Montevecchi WA, Evers DC (2017) Challenges to Oil Spill Assessment  
498 for Seabirds in the Deep Ocean. Arch Environ Contam Toxicol 73:33–39
- 499 Howell SNG, Patteson JB (2008) Variation in the Black-capped Petrel - one species or more?  
500 Alula 14:70-83
- 501 Jodice, PGR, Suryan RM (2010) The transboundary nature of seabird ecology. In: Trombulak SC  
502 and Baldwin RF (eds) Landscape scale conservation planning. Springer, Dordrecht, p 139-  
503 165
- 504 Jodice PGR, Ronconi RA, Rupp E, Wallace GE, Satgé Y (2015) First satellite tracks of the  
505 Endangered black-capped petrel. Endanger Species Res 29:23–33

- 506 Jodice PGR, Adams EM, Lamb JS, Satgé Y, Gleason JS (2019) Strategic Bird Monitoring  
507 Guidelines for the Northern Gulf of Mexico: Seabirds. In: Wilson RR, Fournier AMV,  
508 Gleason JS, Lyons JE, Woodrey MS (eds). Strategic Bird Monitoring Guidelines for the  
509 Northern Gulf of Mexico, Mississippi Agricultural and Forestry Extension Research  
510 Bulletin 1228, Mississippi State University, p 133 – 172
- 511 Kanai Y, Nagendran M, Ueta M, Markin Y, Rinne J, Sorokin AG, Higuchi H, Archibald GW  
512 (2002) Discovery of breeding grounds of a Siberian Crane *Grus leucogeranus* flock that  
513 winters in Iran, via satellite telemetry. *Bird Conserv Int* 12:327–333
- 514 Lamb JS, Newstead DJ, Koczur LM, Ballard BM, Green MC, Jodice PGR (2018) A bridge  
515 between oceans: overland migration of marine birds in a wind energy corridor. *J Avian Biol*  
516 49
- 517 Leopold MF, Geehoed SCV, Scheidat M, Cremer J, Debrot AO, Van Halewijn R (2019) A  
518 review of records of the Black-capped Petrel (*Pterodroma hasitata*) in the Caribbean Sea.  
519 *Mar Ornithol* 47:235–241
- 520 Limiñana R, Arroyo B, Terraube J, McGrady M, Mougeot F (2015) Using satellite telemetry and  
521 environmental niche modelling to inform conservation targets for a long-distance migratory  
522 raptor in its wintering grounds. *Oryx* 49:329–337
- 523 Liu C, Berry PM, Dawson TP, Liu RGP, Berry C, Dawson PM, Pearson TP, Liu C, Berry PM,  
524 Dawson TP, Pearson RG (2005) Selecting thresholds of occurrence in the prediction of  
525 species distributions. *Ecography* 28:385-393



- 526 McCloskey SE, Uher-Koch BD, Schmutz JA, Fondell TF (2018) International migration patterns  
527 of Red-throated Loons (*Gavia stellata*) from four breeding populations in Alaska. PLoS  
528 One 13
- 529 Metzger EJ, Helber RW, Hogan PJ, Posey PG, Thoppil PG, Townsend TL, Wallcraft AJ,  
530 Smedstad OM, Franklin DS, Zamudo-Lopez L, Phelps MW (2017) Global Ocean Forecast  
531 System 3.1 validation test, Tech. rep., Naval Research Lab Stennis Detachment, Stennis  
532 Space Center, Stennis MS
- 533 Middleditch BS (1984) Ecological effects of produced water effluents from offshore oil and gas  
534 production platforms. *Ocean Management* 9:191-316
- 535 Montevecchi WA (2006) Influences of artificial light on marine birds. In: Rich C and Longcore  
536 T (eds) *Ecological consequences of artificial night lighting*. Island Press, Washington D.C.,  
537 p 94-113
- 538 Noss RF, O'Connell MA, Murphy DD (1997) *The science of conservation planning: habitat  
539 conservation under the Endangered Species Act*. Island Press, Washington D.C.
- 540 O'Hara PD, Morandin LA (2010) Effects of sheens associated with offshore oil and gas  
541 development on the feather microstructure of pelagic seabirds. *Mar Pollut Bull* 60:672–678
- 542 Oppel S, Meirinho A, Ramirez I, Gardner B, O'Connell AF, Miller PI, Louzao M (2012)  
543 Comparison of five modelling techniques to predict the spatial distribution and abundance  
544 of seabirds. *Biol Conserv* 156:94–104

- 545 Ortega-Alvarez R, Calderón-Parra R, Molina UM, Molina FM, Molina GM, Molina YM,  
546 Villagrán AM, Freire JM, Robles RV, Loaeza DG, García JM, Loaeza SG, López NIG,  
547 Sánchez-González LA (2020) Updating the distribution of the Sierra Madre sparrow  
548 *Xenospiza baileyi* across central Mexico: Historical records, new localities, and  
549 conservation perspectives. *Avian Conserv Ecol* 15:1–8
- 550 Paluszkiwicz T, Atkinson LP, Posmentier ES, McClain CR (1983) Observations of a loop  
551 current frontal eddy intrusion onto the west Florida shelf. *J Geophys Res* 88:9639–9651
- 552 Paruk JD, Adams EM, Uher-Koch H, Kovach KA, Long D, Perkins C, Schoch N, Evers DC  
553 (2016) Polycyclic aromatic hydrocarbons in blood related to lower body mass in common  
554 loons. *Sci Total Environ* 565:360–368
- 555 Phillips SB, Aneja VP, Kang D, Pal Arya S (2006) Modelling and analysis of the atmospheric  
556 nitrogen deposition in North Carolina. *International Journal of Global Environmental Issues*  
557 6:231–252
- 558 Phillips RA, Croxall JP, Silk JRD, Briggs DR (2007) Foraging ecology of albatrosses and petrels  
559 from South Georgia: Two decades of insights from tracking technologies. *Aquatic*  
560 *Conservation: Marine and Freshwater Ecosystems* 17:S6-S21
- 561 Phillips EM, Horne JK, Adams J, Zamon JE (2018) Selective occupancy of a persistent yet  
562 variable coastal river plume by two seabird species. *Mar Ecol Prog Ser* 594:246–261

- 563 Pinet P, Salamolard M, Probst J-M, Russell JC, Jaquemet S, Le Corre M (2009) Barau's Petrel:  
564 History, biology, and conservation of an endangered endemic petrel. *Mar Ornithol* 37:107–  
565 113
- 566 Poli CL, Harrison AL, Vallarino A, Gerard PD, Jodice PGR (2017) Dynamic oceanography  
567 determines fine scale foraging behavior of Masked Boobies in the Gulf of Mexico. *PLoS*  
568 *One* 12:1–24
- 569 Provencher JF, Liboiron M, Borrelle SB, Bond AL, Rochman C, Lavers JL, Avery-Gomm S,  
570 Yamashita R, Ryan PG, Lusher AL, Hammer S, Bradshaw H, Khan J, Mallory ML (2020)  
571 A horizon Scan of research priorities to inform policies aimed at reducing the harm of  
572 plastic pollution to biota. *Sci Total Environ* 733
- 573 Ramirez P (2005) Oil field-produced water discharges into wetlands: Benefits and risks to  
574 wildlife. *Environ Geosci* 12:65–72
- 575 Ramos R, Carlile N, Madeiros J, Ramírez I, Paiva VH, Dinis HA, Zino F, Biscoito M, Leal GR,  
576 Bugoni L, Jodice PGR, Ryan PG, González-Solís J (2017) It is the time for oceanic  
577 seabirds: Tracking year-round distribution of gadfly petrels across the Atlantic Ocean.  
578 *Divers Distrib* 23:794–805
- 579 Rayner MJ, Hartill BW, Hauber ME, Phillips RA (2010) Central place foraging by breeding  
580 Cook's petrel *Pterodroma cookii*: Foraging duration reflects range, diet and chick meal  
581 mass. *Mar Biol* 157:2187–2194

- 582 Ribic CA, Davis R, Hess N, Peake D (1997) Distribution of seabirds in the northern Gulf of  
583 Mexico in relation to mesoscale features: Initial observations. ICES J Mar Sci 54:545–551
- 584 Satgé YG, Rupp E, Jodice PGR (2019) A preliminary report of ongoing research of the ecology  
585 of Black-capped Petrel in Sierra de Bahoruco, Dominican Republic – I. GPS tracking of  
586 breeding adults. Unpublished report, South Carolina Cooperative Research Unit, Clemson,  
587 SC <https://www.sciencebase.gov/catalog/item/5d8b64fee4b0c4f70d0b0af5>
- 588 Satgé YG, Rupp E, Brown A, Jodice PGR (2020) Habitat modelling locates nesting areas of the  
589 Endangered Black-capped Petrel *Pterodroma hasitata* on Hispaniola and identifies habitat  
590 loss. Bird Conserv Intl 1-18. doi:10.1017/S0959270920000490
- 591 Schroeder KM, McRae SB (2020) Automated auditory detection of a rare, secretive marsh bird  
592 with infrequent and acoustically indistinct vocalizations. Ibis 162:1033–1046
- 593 Simons, TR, Lee DS, Haney JC (2013) Diablotin *Pterodroma hasitata*: A biography of the  
594 endangered Black-capped Petrel. Mar Ornithol:S3–S43
- 595 Spalding MD, Fox HE, Allen GR, Davidson N, Ferdana ZA, Finlayson M, Halpern BS, Jorge  
596 MA, Lombana A, Lourie SA, Martin KD, McManus E, Molnar J, Recchia CA, Robertson J  
597 (2007) Marine ecoregions of the world: A bioregionalization of coastal and shelf areas.  
598 Bioscience 57:573
- 599 Sturges W, Leben R (2000) Frequency of ring separations from the Loop Current in the Gulf of  
600 Mexico: a revised estimate. J Phys Oceanog 30:1814-1819

- 601 Tasker ML, Jones PH, Dixon T, Blake BF (1984) Counting seabirds at sea from ships: A review  
602 of methods employed and a suggestion for a standardized approach. *Auk* 101:567-577
- 603 Underhill, L., and D. Gibbons. 2002. Mapping and monitoring bird populations: their  
604 conservation uses. In: Norris K and Paine DJ (eds) *Conserving bird biodiversity: General*  
605 *principles and their application*. Cambridge University Press, Cambridge, p 34-60
- 606 Veil, J, Puder MG, Elcock D, Redweik Jr RJ (2004) A white paper describing produced water  
607 from production of crude oil, natural gas, and coal bed methane, Argonne Natl. Lab.,  
608 Argonne, IL
- 609 Welch RA, Rychel DF (2004) Produced water from oil and gas operations in the onshore lower  
610 48 states. Northrop Grumman Mission Systems, Information & Technical Services  
611 Division, Tulsa OK p 100
- 612 Wingate DB (1964) Discovery of breeding Black-Capped Petrels on Hispaniola. *Auk* 81:147-159
- 613 Winship AJ, Kinlan BP, White TP, Leirness JB, Christensen J (2018) Modeling at-sea density of  
614 marine birds to support Atlantic marine renewable energy planning: final report. US Dept of  
615 the Interior, Bureau of Ocean Energy Management, Office of Renewable Energy Programs,  
616 Sterling, VA. OCS Study BOEM, 10, 67.
- 617 Wisz MS, Hijmans RJ, Li J, Peterson AT, Graham CH, Guisan A, Elith J, Dudík M, Ferrier S,  
618 Huettmann F, Leathwick JR, Lehmann A, Lohmann L, Loiselle BA, Manion G, Moritz C,  
619 Nakamura M, Nakazawa Y, Overton JMC, Phillips SJ, Richardson KS, Scachetti-Pereira R,

620 Schapire RE, Soberón J, Williams SE, Zimmermann NE (2008) Effects of sample size on  
621 the performance of species distribution models. *Divers Distrib* 14:763–773

622 Yang Y, Weisberg RH, Liu Y, Liang XS (2020) Instabilities and multiscale interactions  
623 underlying the loop current eddy shedding in the Gulf of Mexico. *J Phys Oceanogr*  
624 50:1289–1317

625 Zhou C, Jiao Y, Browder, J (2019) Seabird bycatch vulnerability to pelagic longline fisheries:  
626 ecological traits matter. *Aquatic Conserv: Mar and Freshw Ecosyst* 29: 1324-1335

627

628 Table 1. Summary of records of black-capped petrels (*Pterodroma hasitata*) for the Gulf of  
 629 Mexico not including surveys from the post-spill Deepwater Horizon Natural Resources Damage  
 630 Assessment (NRDA) or the Gulf of Mexico Marine Assessment Program for Protected Species  
 631 (GoMMAPPS).

| Source Type/Source      | Years and seasons reported            | Descriptive location           | Approximate area                             | Number of recorded black-capped petrels                                                                                                    |
|-------------------------|---------------------------------------|--------------------------------|----------------------------------------------|--------------------------------------------------------------------------------------------------------------------------------------------|
| <u>At-sea Surveys</u>   |                                       |                                |                                              |                                                                                                                                            |
| Davis and Fargion 1995  | 1992 - 1994<br>All seasons            | Western and north central Gulf | (87°- 97° W Longitude, 26° - 29° N Latitude) | n = 0 (although 1 unidentified petrel noted)                                                                                               |
| Ribic et al. 1997       | 1992 - 1993<br>All seasons            | Western and north central Gulf | (87°- 97° W Longitude, 26° - 29° N Latitude) | n = 0                                                                                                                                      |
| Davis et al. 2000       | 1996 - 1997<br>Spring, Summer, Winter | Western and north central Gulf | (87°- 97° W Longitude, 26° - 29° N Latitude) | n = 0                                                                                                                                      |
| <u>Compilations</u>     |                                       |                                |                                              |                                                                                                                                            |
| Duncan and Harvard 1980 | ~ 1954 - 1980                         | Northern Gulf                  | 26° -29° N Latitude                          | n = 1 unidentified petrel (eastern Gulf)                                                                                                   |
| Clapp et al. 1982       | 1900 - 1980                           | Northern Gulf                  | n/a                                          | n = 1 mortality ~ 65 km inland, Leon County, Florida, Autumn 1964                                                                          |
| Simons et al. 2013      | 1900 - 2011                           | Entire Gulf                    | n/a                                          | n = 2 ~ 100 km off Port O'Connor Texas, May 1994 & July 1997<br>n = 1 beach recovery, Florida Gulf coast, Autumn 2011                      |
| eBird                   | Prior to November 2020                | Entire Gulf                    | n/a                                          | n = 2 ~ Dry Tortugas Florida, April 2011<br>n = 1 ~ Key West near shelf break, April 2017<br>n ~ 4 birds ~220 km SE Galveston Bay November |

2016 (n = 1-3) and  
January 2017 (n = 1)

632

633



634 Table 2. Black-capped petrels (*Pterodroma hasitata*) observed during research cruises from two  
 635 research programs in the northern Gulf of Mexico. Surveys conducted in 2010 and 2011 were a  
 636 component of the post-spill *Deepwater Horizon* Natural Resources Damage Assessment  
 637 (NRDA). Surveys conducted in 2017 – 2019 were a component of the Gulf of Mexico Marine  
 638 Assessment Program for Protected Species (GoMMAPPS). Detections refer to an observation of  
 639  $\geq 1$  black-capped petrel.

| Survey program/<br>Date observed | Count of detections | Count of individuals<br>within detection |
|----------------------------------|---------------------|------------------------------------------|
| <u>NRDA</u>                      |                     |                                          |
| 14 July 2010                     | 1                   | 1                                        |
| 15 July 2010                     | 1                   | 1                                        |
| 10 August 2010                   | 1                   | 1                                        |
| 07 September 2010                | 1                   | 1                                        |
| 24 February 2011                 | 1                   | 1                                        |
| <u>03 May 2011</u>               | <u>2</u>            | <u>3,1</u>                               |
| SUM                              | 7                   | 9                                        |
| <u>GoMMAPPS</u>                  |                     |                                          |
| 18 May 2017                      | 1                   | 1                                        |
| 23 July 2017                     | 2                   | 1,1                                      |
| 26 July 2017                     | 1                   | 1                                        |
| 10 August 2017                   | 4                   | 1,1,1,1                                  |
| 21 August 2017                   | 1                   | 1                                        |
| 11 March 2018                    | 1                   | 1                                        |
| 14 March 2018                    | 1                   | 1                                        |
| 29 April 2018                    | 1                   | 1                                        |
| 04 May 2018                      | 1                   | 1                                        |
| 15 August 2018                   | 1                   | 1                                        |
| 19 August 2018                   | 2                   | 1,1                                      |
| 22 August 2018                   | 1                   | 1                                        |
| 23 August 2018                   | 2                   | 1,1                                      |
| 24 August 2018                   | 4                   | 1,1,1,1                                  |
| 26 August 2018                   | 1                   | 1                                        |
| 27 August 2018                   | 2                   | 2,2                                      |
| 16 September 2018                | 1                   | 1                                        |
| 05 September 2019                | 1                   | 1                                        |
| <u>11 September 2019</u>         | <u>1</u>            | <u>1</u>                                 |
| SUM                              | 29                  | 31                                       |
| TOTAL                            | 36                  | 40                                       |

640

641

642

643 Table 3. Relative contribution of environmental variables to habitat suitability of black-capped  
644 petrels (*Pterodroma hasitata*) in the northern Gulf of Mexico. See Methods for description of %  
645 contribution and permutation importance. Permutation importance sums to 100 across all  
646 variables.  
647

| Variable                        | % contribution | Permutation importance |
|---------------------------------|----------------|------------------------|
| Sea-surface salinity            | 41.1           | 31.3                   |
| Current direction               | 24.2           | 0.4                    |
| Sea-surface height              | 18.5           | 10.5                   |
| Bathymetry                      | 9.7            | 26.6                   |
| Current velocity: v (northward) | 6.2            | 31.1                   |
| Absolute current strength       | 0.2            | 0.0                    |
| Current velocity: u (eastward)  | 0.1            | 0.0                    |
| Sea-surface temperature         | 0.0            | 0.0                    |

648

649

650 Fig. 1. Breeding locations (known and suspected) and marine range of black-capped petrel  
651 (*Pterodroma hasitata*). Breeding sites are labeled as suspected (e.g., evidence of black-capped  
652 petrel presence based on audio or radar surveys) and documented. The marine range differs  
653 among four primary sources and each is displayed for reference. Credit for base map: ESRI,  
654 Garmin, GEBCO, NOAA, NGDC, and other contributors.

655

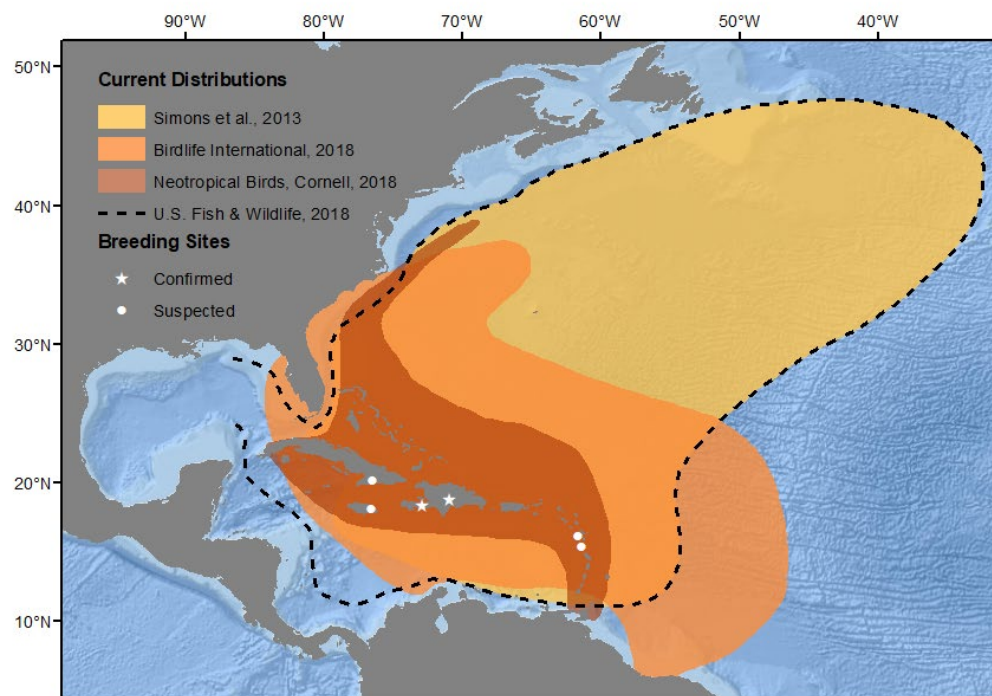

656

657

658

659

660 Fig. 2. Spatial footprint of research cruises from two research programs in the northern Gulf of  
661 Mexico from which black-capped petrels (*Pterodroma hasitata*) were observed. (A) Surveys  
662 conducted in 2010 and 2011 were a component of the post-spill *Deepwater Horizon* Natural  
663 Resources Damage Assessment (NRDA). (B) Surveys conducted in 2017 – 2019 were a  
664 component of the Gulf of Mexico Marine Assessment Program for Protected Species  
665 (GoMMAPPS). Credit for base map: ESRI, Garmin, GEBCO, NOAA, NGDC, and other  
666 contributors.

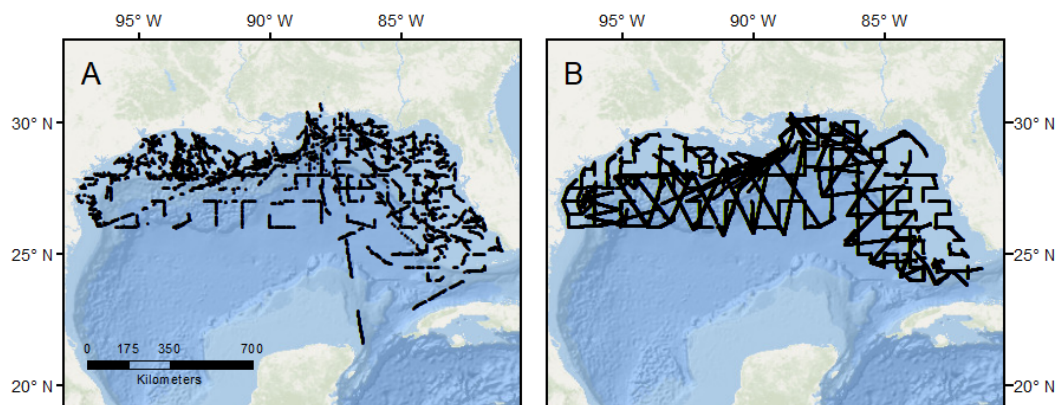

667

668

669

670

671 Fig. 3. Locations of black-capped petrels (*Pterodroma hasitata*) observed during research cruises  
672 in the northern Gulf of Mexico. Surveys conducted in 2010 and 2011 were a component of the  
673 post-spill *Deepwater Horizon* Natural Resources Damage Assessment (NRDA). Surveys  
674 conducted in 2017 – 2019 were a component of the Gulf of Mexico Marine Assessment Program  
675 for Protected Species (GoMMAPPS). Credit for base map: ESRI, Garmin, GEBCO, NOAA,  
676 NGDC, and other contributors.

677

678

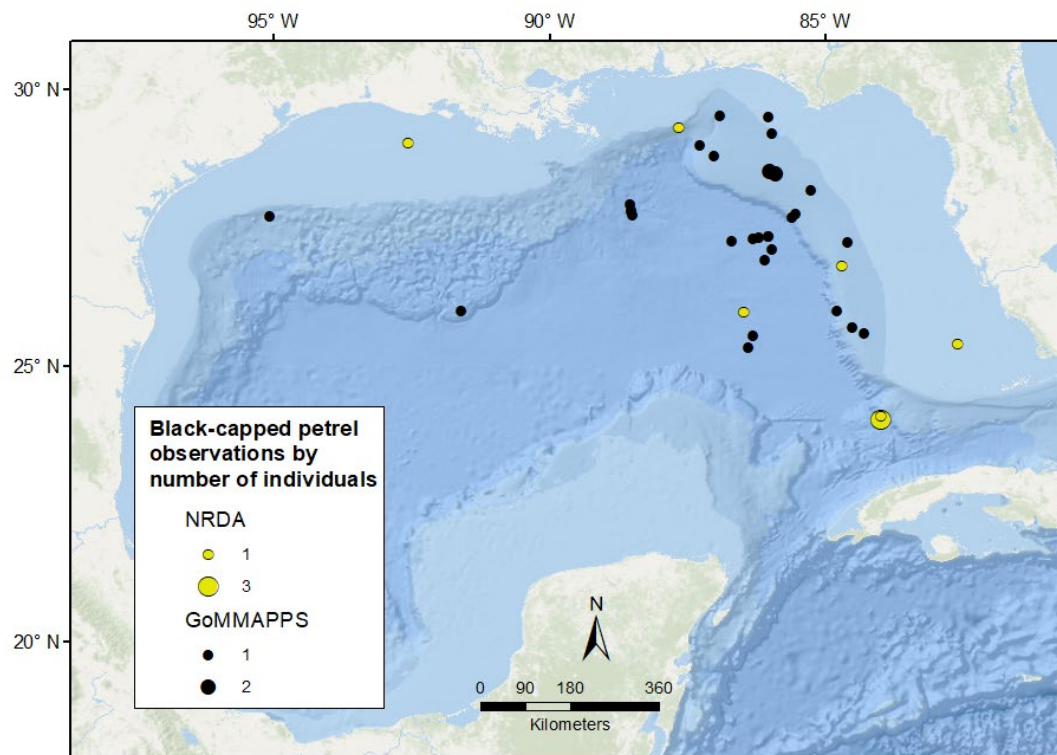

679

680 Fig. 4. Predicted probability of black-capped petrel (*Pterodroma hasitata*) occurrence with  
681 observations from the post-spill Deepwater Horizon Natural Resources Damage Assessment  
682 (NRDA) and the Gulf of Mexico Marine Assessment Program for Protected Species  
683 (GoMMAPPS) surveys overlaid. Blue shades indicate a very small probability of occurrence  
684 while yellow shades indicate a high probability of occurrence based on habitat suitability. Credit  
685 for base map: ESRI, Garmin, GEBCO, NOAA, NGDC, and other contributors.

686

687

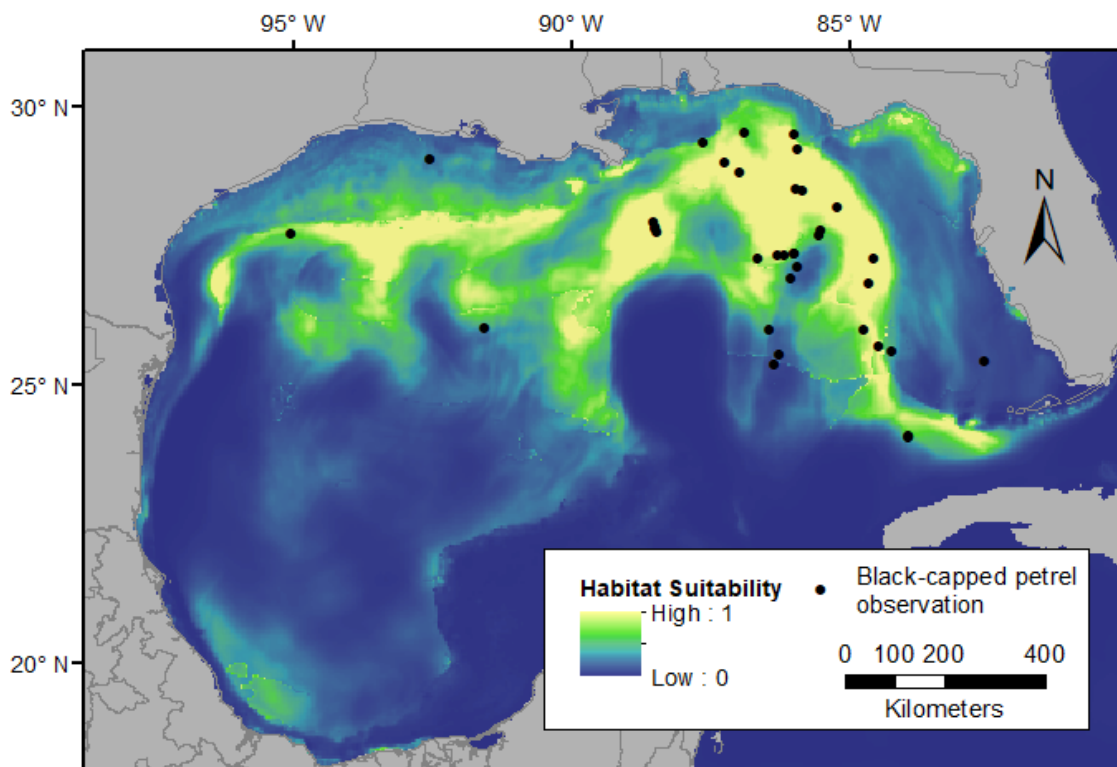

688

689 Fig. 5. Response curves of habitat suitability of black-capped petrels (*Pterodroma hasitata*) in  
690 the northern Gulf of Mexico to (A) sea surface height, (B) current direction, and (C) sea surface  
691 salinity based on models developed in Maxent. Habitat suitability increases along the y axis (i.e.,  
692 relatively higher probability of occurrence).

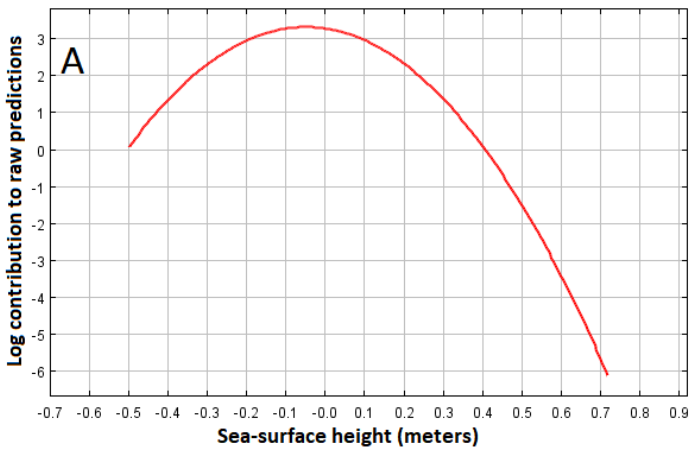

693

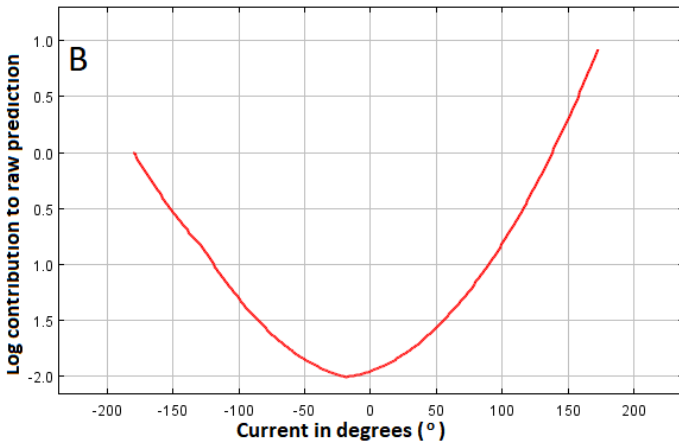

694

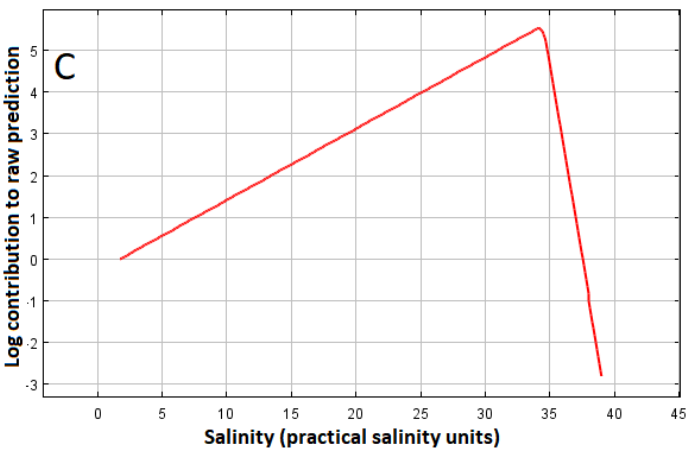

695

696

697 Fig. 6. Black-capped petrel (*Pterodroma hasitata*) in the northern Gulf of Mexico. (A) 90%  
698 utilization distribution (based on observations collected from surveys conducted during the post-  
699 spill Deepwater Horizon Natural Resources Damage Assessment (NRDA) and the Gulf of  
700 Mexico Marine Assessment Program for Protected Species (GoMMAPPS)) overlaid on predicted  
701 habitat suitability, and (B) proposed range for black-capped petrels in the northern Gulf of  
702 Mexico as indicated by a minimum convex polygon encompassing the 90% utilization  
703 distribution. Credit for base map: ESRI, Garmin, GEBCO, NOAA, NGDC, and other  
704 contributors.

705

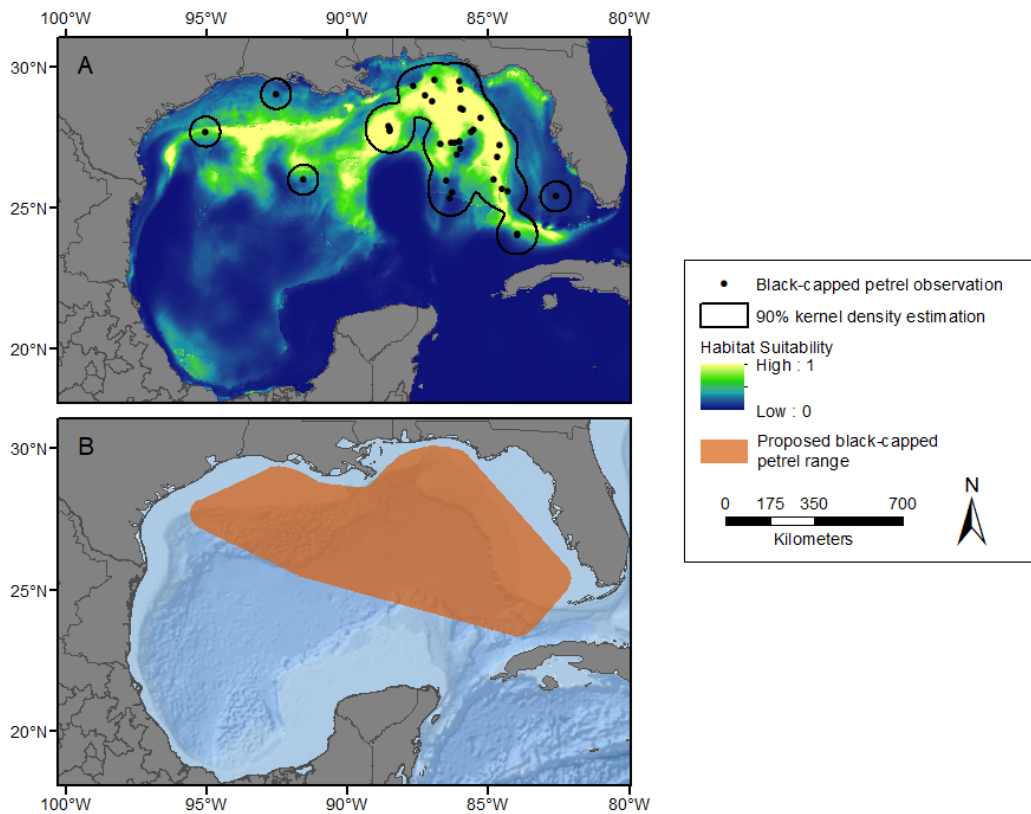

706
